## RETRACTION

# Retraction: The polarity factor Bucky ball associates with the centrosome and promotes microtubule rearrangements to establish the oocyte axis in zebrafish

**Meredyth M. Forbes, Bruce W. Draper and Florence L. Marlow**

Retraction of: Development doi: 10.1242/dev.129023.

The corresponding author of this article contacted the journal shortly after the authors' accepted version of the manuscript was posted online, regarding potential issues with a number of the figures in this paper. Specifically, the first author (M.M.F.) admitted to manipulating some of the data shown in Figs 5, 7, 8 and 9. The existence of potential issues with data in the paper was noted in an Expression of Concern published by the journal; this Retraction updates and replaces that Expression of Concern. The original article and Expression of Concern are available in the supplementary information to this Retraction notice.

The corresponding author and her colleagues have been engaged in efforts to repeat all experiments in the paper, and have been unable to fully replicate the results shown in the above-referenced figures. Specifically, there are some quantitative inconsistencies between the original and replicate data in Figs 5 and 7. For the experiments in Figs 8 and 9, efforts to detect EB3 signals on fixed samples were unsuccessful; we are therefore unable to have confidence in the data in those figures. We are therefore retracting this paper, with the agreement of all authors and the editors of the journal. Those parts of the study that have been fully validated through the replication efforts of the authors will hopefully be submitted for publication in due course.

The authors sincerely regret any confusion that the publication of these data may have caused to the scientific community.
